# Supplementary material for: Paired involvement of human-specific Olduvai domains and NOTCH2NL genes in human brain evolution
Source: PubMed Central journal article supplement (PMC6611739; doi:10.1007/s00439-019-02018-4), 2019-05-13

A)

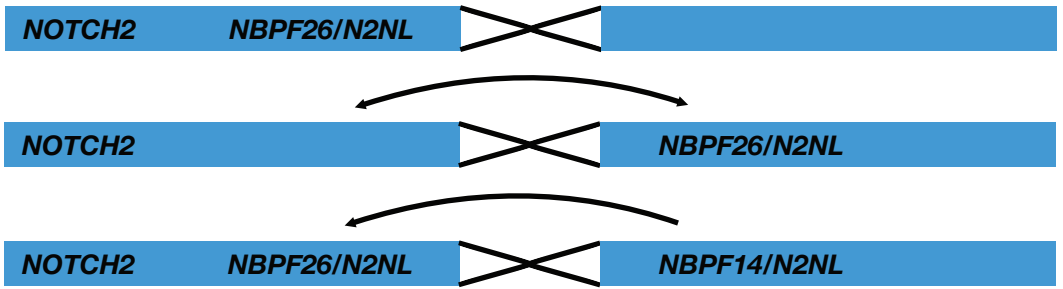

B)

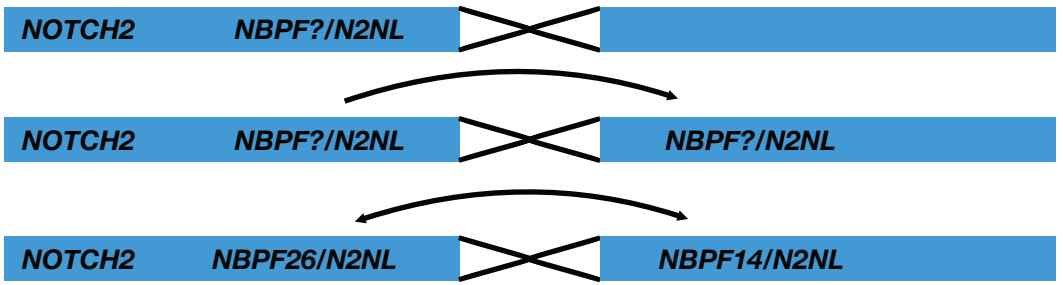

C)

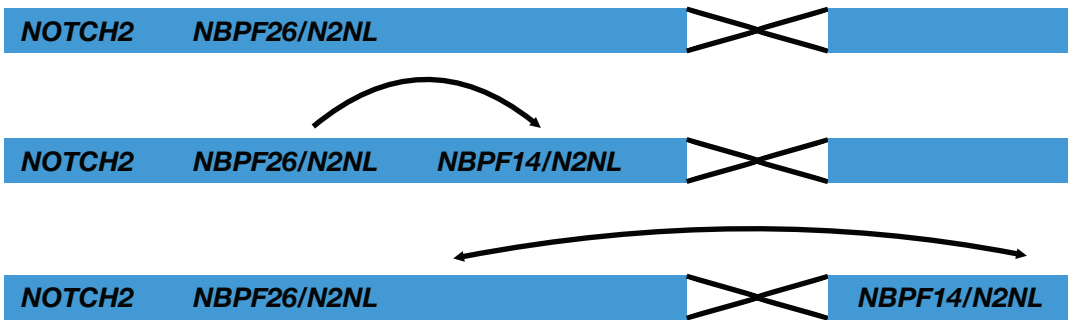

Supplement: 439_2019_2018_MOESM1_ESM.pdf [file 439_2019_2018_MOESM1_ESM.pdf]
